# Supplementary material
Source: Springer Nature journal article supplement (https://www.springermedizin.de/resource/supplementary/12936_2013_3064_MOESM1_ESM.pdf/9545022)
Supplement: MOESM1 [file 9545022]

# Unit Costs of Long-Lasting Insecticidal Nets (LLIN) over Time

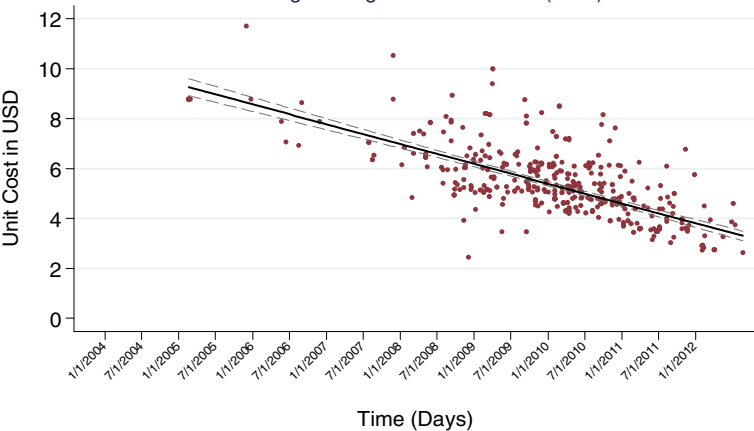

• Unit Cost    - - - - Fitted Trend 95%CI    — Fitted trend

Coef.=.002 (P<.001)

R-squared=.551
